# Supplementary material for: Colorimetric mercury detection with enhanced sensitivity using magnetic-Au hybrid nanoparticles
Source: Royal Society of Chemistry journal article supplement (doi:10.1039/d3na00129f), 2023-01-01
Supplement: d3na00129f1.pdf [file d3na00129f1.pdf]

# Colorimetric mercury detection with enhanced sensitivity using Magnetic-Au hybrid nanoparticles

Miseon Jeong, Dahyun Bae, and Jin-sil Choi

Department of Chemical and Biological Engineering, Hanbat National University 34158 Daejeon, Republic of Korea.

## Synthesis of iron-oxide nanoclusters

Iron-oxide nanoclusters were synthesized using a synthetic hydrothermal method.  $\text{FeCl}_3 \cdot 6\text{H}_2\text{O}$  (0.68 g), polyacrylic acid (0.293 g), NaOAc (3.681 g), and ethylene glycol (10 mL) were vigorously stirred for 1 hour in an oil bath at  $160^\circ\text{C}$  in a round-necked flask. The resulting mixture was placed in a Teflon vial and autoclaved at  $200^\circ\text{C}$  for 10 hours. After the reaction, the solution was centrifuged three times with acetone and separated.

## Silica coating on $\text{Fe}_3\text{O}_4$

A solution containing the iron-oxide nanoclusters (6.01 mg), ethanol (444.42 mL), distilled water (8.88 mL), and aqueous ammonia (28~30%, 15.12 mL) were placed in a beaker and stirred. While stirring the solution, tetraethylorthosilicate (15  $\mu\text{L}$ ) in 5 mL ethanol were added dropwise at a flow rate of 8 mL/h. After the reaction was completed, (3-aminopropyl)trimethoxysilane (25  $\mu\text{L}$ ) in 1.67 mL ethanol were added and stirred for 1 hour to achieve surface amination.

## Synthesis of the Au seed solution

A solution containing NaOH (0.16 g), tetrakis(hydroxymethyl)phosphonium chloride (96  $\mu\text{L}$ ), and 848 mL distilled water were stirred for 15 min. Then, mixture containing 0.192 g  $\text{HAuCl}_4 \cdot x\text{H}_2\text{O}$  (0.68 mM) and 19.2 mL of distilled water was rapidly added to the vigorously stirred solution. The resulting mixture was stirred for 30 min. It was then stored at  $4^\circ\text{C}$  for three days.

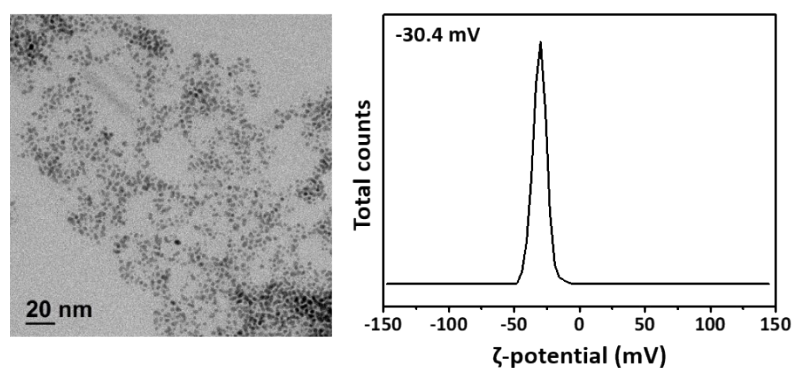

**Figure S1.** Transmission electron micrographs (TEM) and zeta-potential results of the Au seed.

## Preparation of the gold growth solution

HAuCl<sub>4</sub>·xH<sub>2</sub>O (0.6 g) was added to 20 mL distilled water and stored overnight at 4°C in the dark. To this solution, 1 g of K<sub>2</sub>CO<sub>3</sub> and 1.58 L of distilled water were mixed, stored overnight in the dark at room temperature, and then stored in a refrigerator (4°C).

## Formation of Mag-Au hybrid nanoparticles

After mixing 1.6 L of the growth solution (0.2 mM) and 20 mL of bis(p-sulfonatophenyl)phenylphosphine dihydrate dipotassium salt (22.6 μM) with 1 mg of Fe<sub>3</sub>O<sub>4</sub>@SiO<sub>2</sub> attached to the Au seed, 32 mL NH<sub>2</sub>OH·HCl (363.2 μM) was added while stirring. Subsequently, the mixture was stirred for three days. Finally, the separation was performed using a centrifuge.

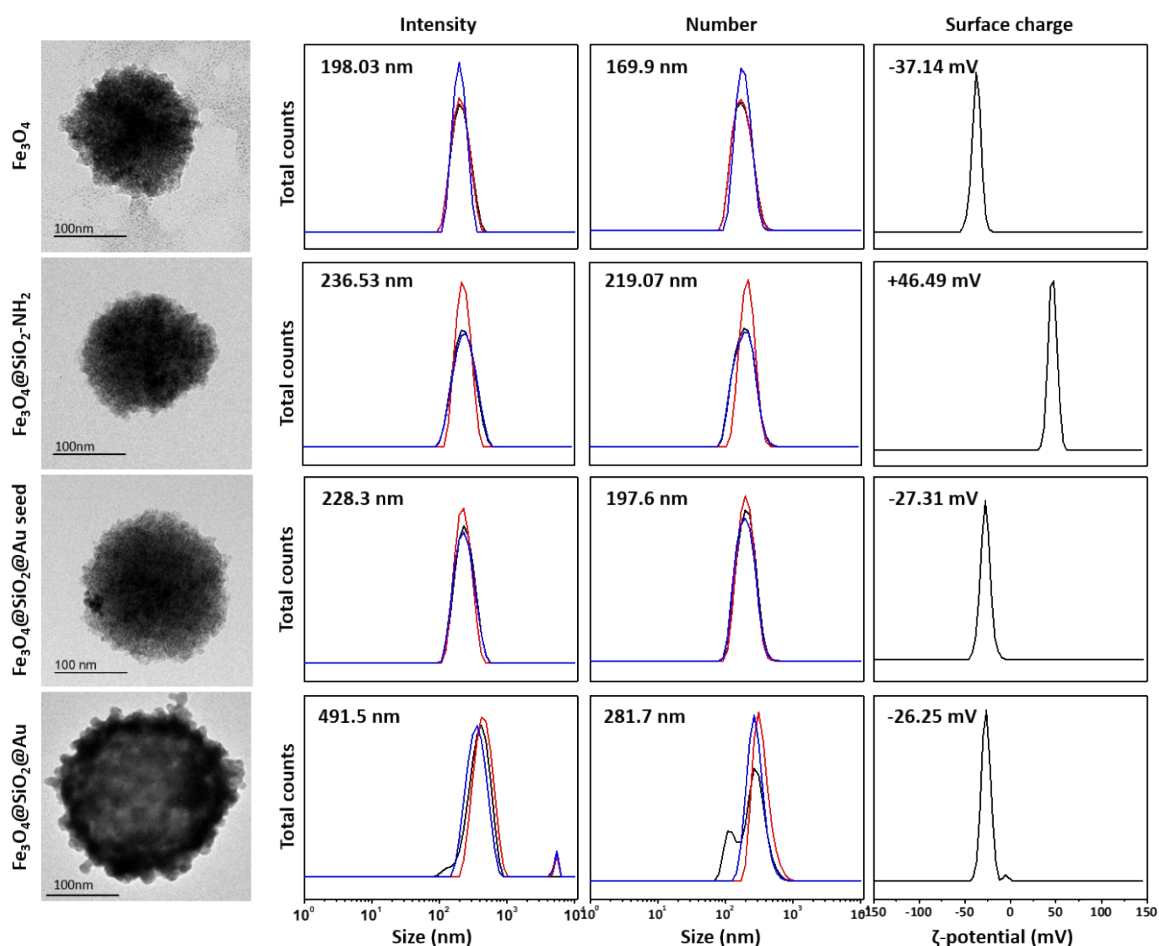

**Figure S2.** TEM images, hydrodynamic size, and surface charge of Fe<sub>3</sub>O<sub>4</sub>, Fe<sub>3</sub>O<sub>4</sub>@SiO<sub>2</sub>-NH<sub>2</sub>, Fe<sub>3</sub>O<sub>4</sub>@SiO<sub>2</sub>@Au seeds, and Fe<sub>3</sub>O<sub>4</sub>@SiO<sub>2</sub>@Au nanoparticles.

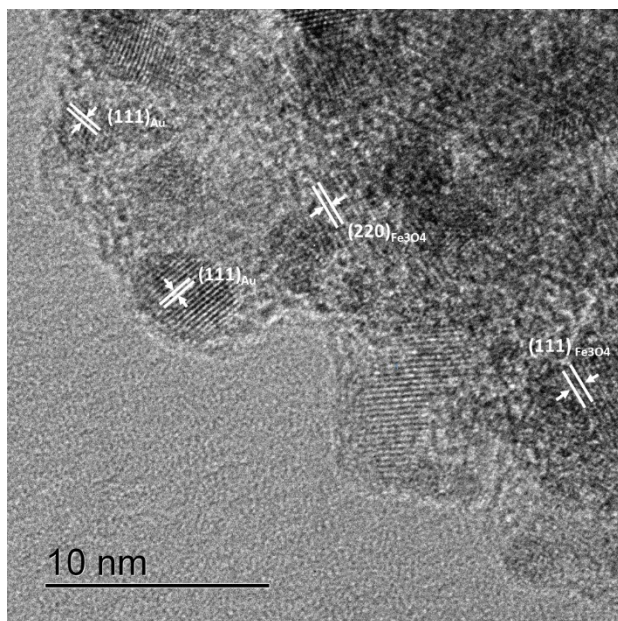

**Figure S3.** High-resolution TEM image of Mag-Au.

**Table S1.** Elemental analysis of Mag-Au using energy dispersive spectrometry (EDS)

| Element   | EDS mapping |       |         |
|-----------|-------------|-------|---------|
|           | Line Type   | Wt%   | Atomic% |
| <b>Si</b> | K series    | 2.45  | 11.64   |
| <b>Fe</b> | K series    | 13.12 | 31.28   |
| <b>Au</b> | L series    | 84.43 | 57.08   |

Comparison of  $\text{Hg}^{2+}$  detection capability between  $\text{Fe}_3\text{O}_4$ ,  $\text{Fe}_3\text{O}_4@\text{SiO}_2$ , and  $\text{Fe}_3\text{O}_4@\text{SiO}_2@\text{Au}$  (Mag-Au)

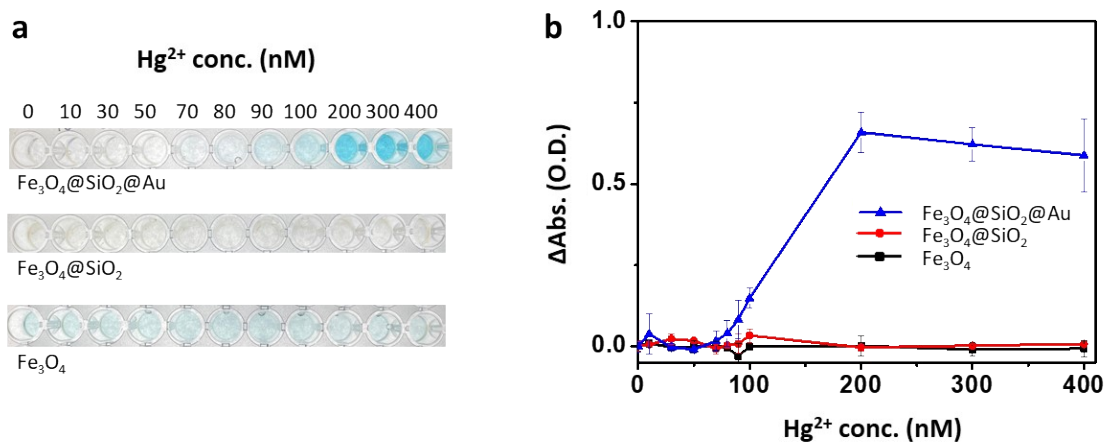

**Figure S4.** (a) Photograph of indicator solution reacted with varying concentrations of  $\text{Hg}^{2+}$  ions. The graph of  $\text{Hg}^{2+}$  ion concentration vs. absorption intensity (@ 652 nm) of the indicator solution.

Elemental analysis of Mag-Au after reaction with  $\text{Hg}^{2+}$  ions

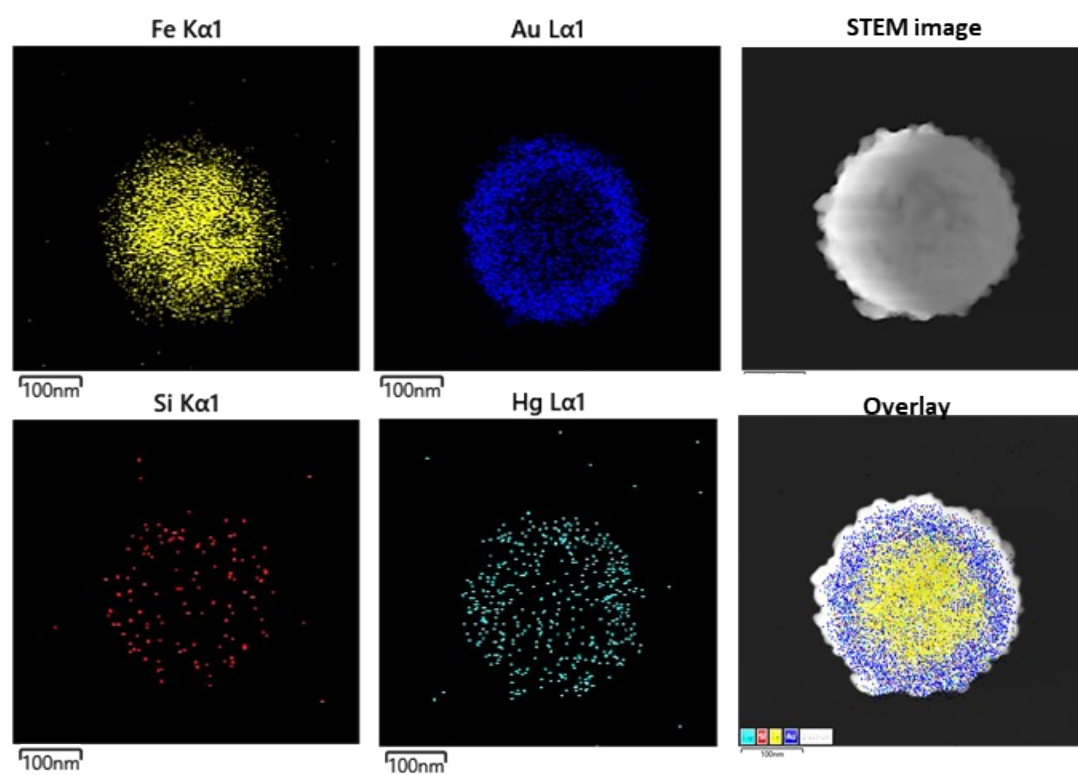

**Figure S5.** The color-mapped Scanning transmission electron microscopic images of Mag-Au after reaction with  $\text{Hg}^{2+}$  ions to observe the distribution of elements.

Composition analysis of Mag-Au before and after the reaction with  $\text{Hg}^{2+}$  using X-ray photoelectron spectra (XPS)

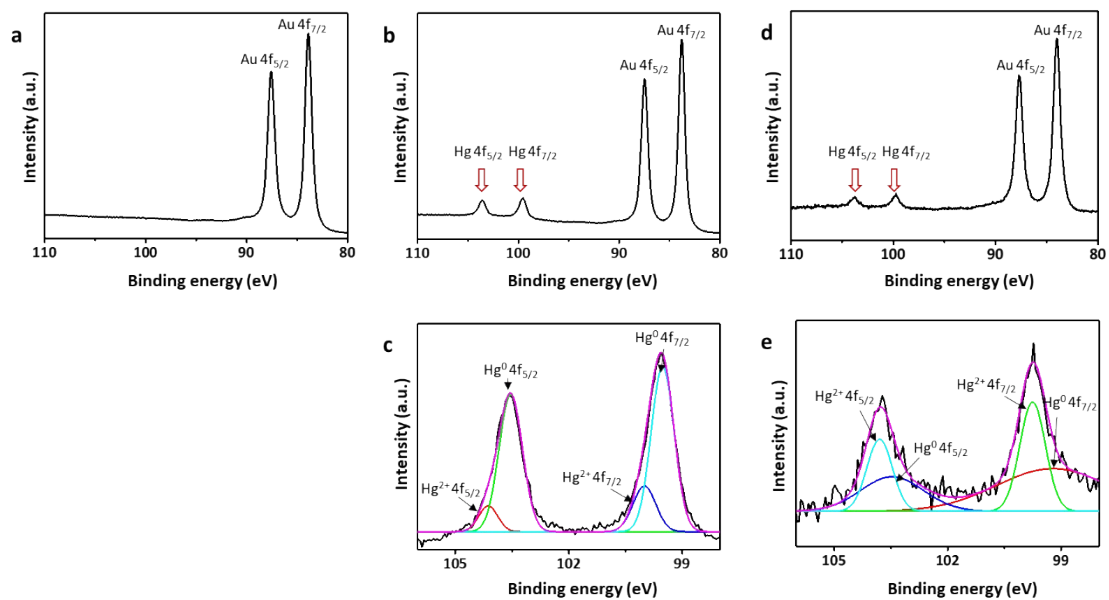

**Figure S6.** XPS of pristine Mag-Au (a), Mag-Au purified after reaction with  $\text{Hg}^{2+}$  ions (Mag-Au@Hg, b and c), and Mag-Au@Hg after the reaction with TMB and  $\text{H}_2\text{O}_2$  (d and e).

Comparison of Hg detection capability of Mag-Au in different buffer condition

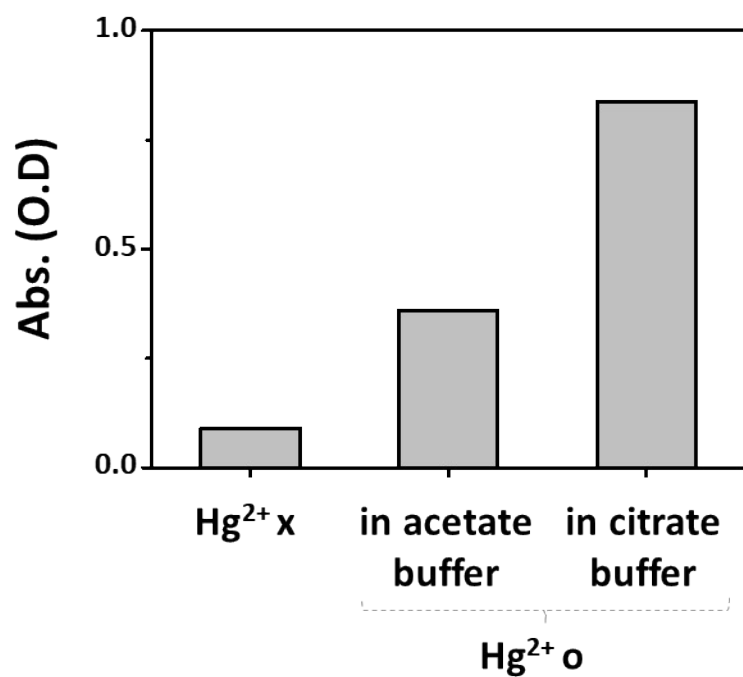

Figure S7. Absorbance comparison of Hg<sup>2+</sup> detection solution in different buffers at the same pH.

### Reactive oxygen species generation test using 1,3-diphenylisobenzofuran (DPBF)

The absorbance of a DPBF solution (2.5  $\mu\text{M}$ , 5  $\mu\text{L}$  dissolved in DMSO) containing Mag-Au NPs (300  $\mu\text{g}/\text{mL}$ , 10  $\mu\text{L}$  in 10 mM pH 5.4 citrate buffer) at 416 nm was monitored for 60 minutes. In the presence of reactive oxygen species (ROS), DPBF is converted to 1,3-dibenzoylbenzene (DBB), leading to a decrease in absorbance at 416 nm.

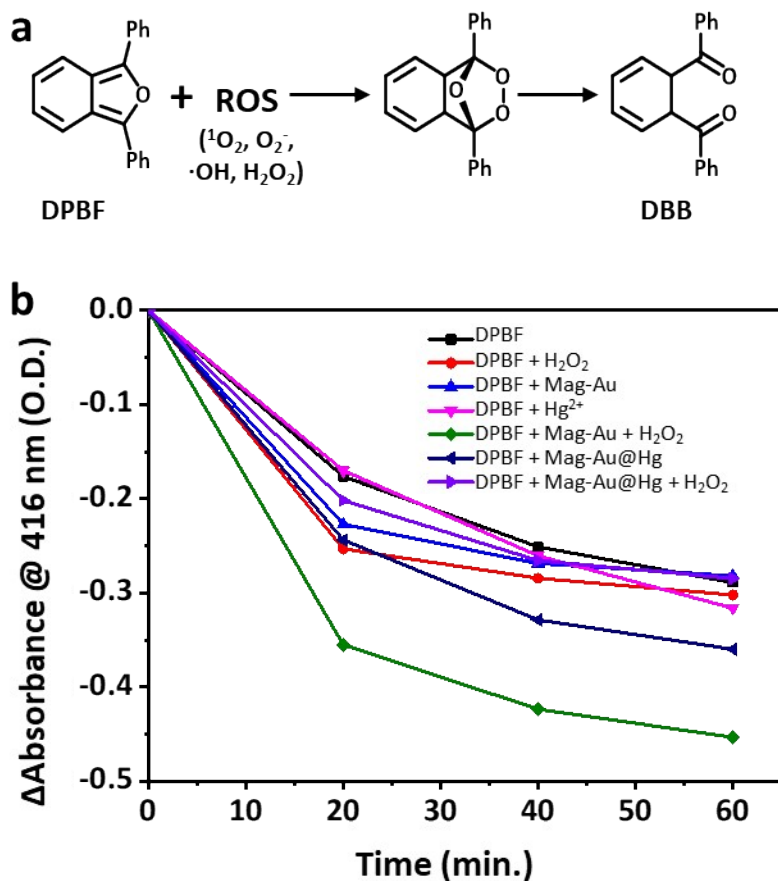

**Figure S8.** Chemical structure and fluorescent quenching scheme of the decomposition of 1,3-diphenylisobenzofuran (DPBF) to 1,2-dibenzoylbenzen (DBB) by ROS.



Comparison of the catalytic effect of Mag-Au under different reaction conditions

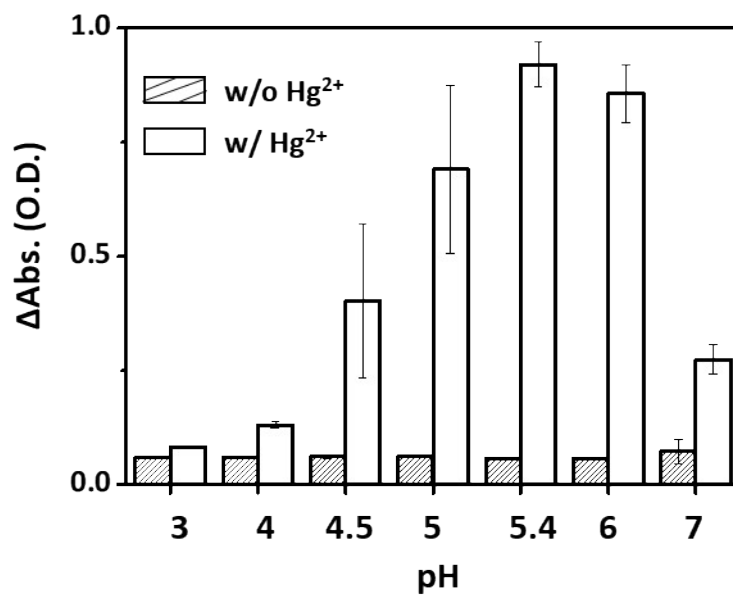

Figure S9. pH-dependent catalytic effect of Mag-Au.

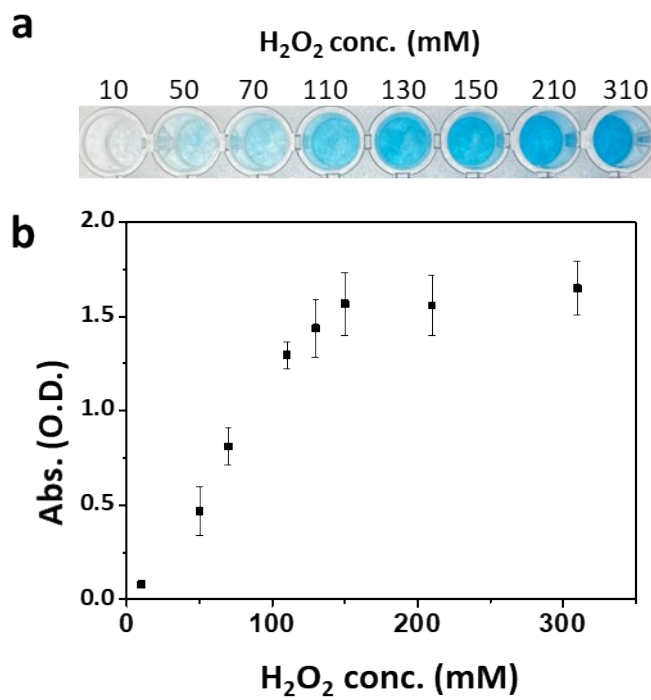

Figure S10. H<sub>2</sub>O<sub>2</sub> concentration-dependent (a) color change and (b) absorption intensity.

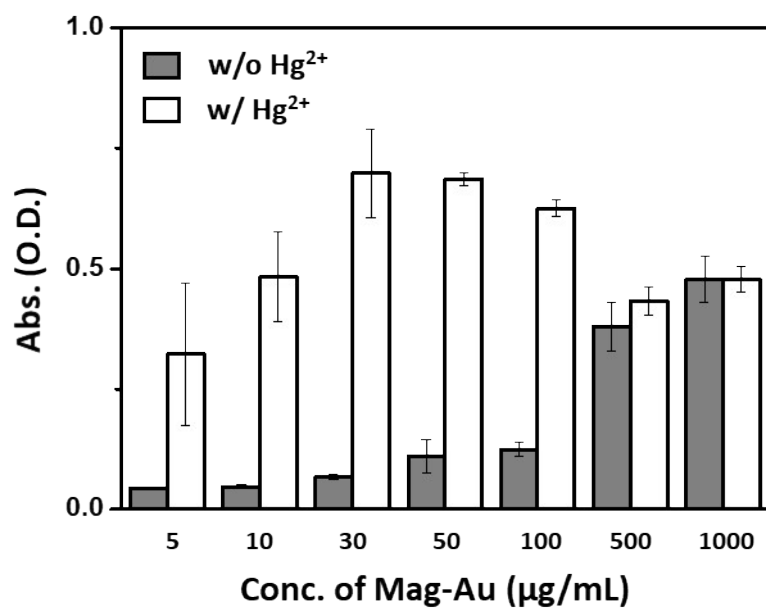

**Figure S11.** Concentration-dependent catalytic effects of Mag-Au.
